# Prevalence of Diabetes in Care Home Residents

ALAN J. SINCLAIR, MD, FRCP<sup>1</sup>  
 ROGER GADSBY, MB<sup>2</sup>  
 SUE PENFOLD, MB<sup>5</sup>

SIMON C.M. CROXSON, MD, FRCP<sup>3</sup>  
 ANTONY J. BAYER, MB<sup>4</sup>

**OBJECTIVE** — To determine the prevalence of known and undetected diabetes diagnosed either by an elevated fasting baseline sample or by a 2-h post-glucose load sample in a group of residents of care homes in an urban-district setting.

**RESEARCH DESIGN AND METHODS** — We completed individual interviews with patients and caregivers in 30 care homes (both residential and nursing homes) in two metropolitan districts of Birmingham, West Midlands, U.K. All care homes were under the supervision of primary care physicians (general practitioners). We carried out 75-g oral glucose tolerance tests (OGTTs) in consenting residents without previous known diabetes. Criteria for diagnosis of diabetes were obtained from the World Health Organization (1998) and the American Diabetes Association (1997).

**RESULTS** — Of 636 residents available for study, 76 residents (12.0%) were known to have diabetes; of the 560 remaining residents, 286 either refused to participate or were deemed too ill or unavailable to undergo testing. Complete data on 274 OGTTs were obtained (median age 83 years, range 45–101). A total of 46 subjects were diagnosed as having diabetes and 94 as having impaired glucose tolerance. Allowing for subjects who refused or were unable to participate, the calculated total prevalence (which includes known and newly detected diabetes) was 26.7% (95% CI 21.9–32.0). The calculated overall prevalence of impaired glucose tolerance was 30.2% (25.2–35.6).

**CONCLUSIONS** — In a group of care home residents not known to have diabetes and able to undergo testing, a substantial proportion have undetected diabetes based on a 2-h postglucose load. These residents warrant further study as they may be at higher cardiovascular risk and require an intervention.

*Diabetes Care* 24:1066–1068, 2001

In the U.K., current care home practices do not include screening for diabetes either at the time of admission or subsequently thereafter. A view often expressed is that diabetes screening in older subjects is not justified, as the benefits of therapeutic intervention and life expectancy are substantially reduced (1). Nevertheless, a large proportion of residents newly diagnosed with diabetes are likely

to have vascular complications that can deteriorate significantly during a 1–2 year period, which reflects their average duration of stay (2). In addition, undiagnosed diabetes in residential care may be a risk factor for the development of hyperosmolar nonketotic coma and increased mortality (3,4).

Few studies have investigated the prevalence of diabetes in residential care

settings. In the U.S., the National Nursing Home Survey (5) estimated that 14.5% of nursing home residents had diabetes; of these residents, 75% were  $\geq 74$  years of age. A more recent study in a public long-term care facility in Rochester, NY, has suggested a prevalence of  $\sim 21\%$  (6). In the U.K., two observational studies of residents in residential care have reported the prevalence of known diabetes to be 7.2 and 9.9%, respectively (2,7), but these studies may underestimate the true prevalence because they did not include objective testing of glucose tolerance. The differences in prevalence rates of known diabetes between the U.K. and the U.S. also reflect the well-recognized differences in the populations as a whole (8,9).

We therefore decided to investigate the prevalence of known and undetected diabetes diagnosed either by the fasting baseline sample or by the 2-h post-glucose load sample in a group of residents of care homes in an urban-district setting.

## RESEARCH DESIGN AND METHODS

Subjects were residents of care homes (nursing and residential) in two multiethnic districts of metropolitan Birmingham. Residential homes provide personal and social care only, and residents are usually mobile and continent. Residents in nursing homes have much higher levels of dependency and may have physical and mental disabilities: they require 24-h nursing care. A total of 37 care homes were potentially available for study within both districts, but 7 of them either refused or were unable to participate because of closure or refurbishment. In the 30 participating care homes, there was 92% occupancy, with 636 residents.

Detailed examination of medical records and treatment charts confirmed the presence of diabetes in 76 residents, giving a 12% prevalence of known diabetes. Subjects without a history of diabetes were considered for an oral glucose tolerance test (OGTT) that consisted of a 75-g anhydrous glucose load (115 ml Hycal), given after a confirmed overnight fast. Fasting and 2-h postchallenge capillary plasma glucose samples were taken and

From the <sup>1</sup>Diabetes Research Unit, Selly Oak Hospital, University of Birmingham, Birmingham; <sup>2</sup>Red Roofs Surgery, Nuneaton; the <sup>3</sup>Department of Medicine for the Elderly, Bristol General Hospital, Bristol; the <sup>4</sup>Department of Geriatric Medicine, University of Wales College of Medicine, Llandough Hospital, Penarth; and <sup>5</sup>the Department of Primary Care Medicine, the Ladywood Project, U.K.

Address correspondence and reprint requests to Prof. A.J. Sinclair, Professor of Medicine and Consultant Diabetologist, Diabetes Research Unit, Centre for Health Services Studies (CHESS), University of Warwick, Coventry CV4 7AL, U.K. E-mail: a.j.sinclair@bham.ac.uk.

Received for publication 22 August 2000 and accepted in revised form 23 February 2001.

**Abbreviations:** IGT, impaired glucose tolerance; OGTT, oral glucose tolerance test.

A table elsewhere in this issue shows conventional and Système International (SI) units and conversion factors for many substances.

**Table 1—Results of the OGTT carried out in 274 residents**

|                                    | 2-h OGTT values (mmol/l) |          |       | Diabetic | IGT | Total |
|------------------------------------|--------------------------|----------|-------|----------|-----|-------|
|                                    | <8.9                     | 8.9–12.1 | ≥12.2 |          |     |       |
| Fasting capillary glucose (mmol/l) |                          |          |       |          |     |       |
| <6.1                               | 133                      | 91       | 30    | 30       | 91  | 254   |
| 6.1–6.9                            | 1                        | 3        | 7     | 7        | 3   | 11    |
| 7.0–7.7                            | 1                        | 2        | 2     | 5        | 6   | 5     |
| ≥7.8                               | 0                        | 0        | 4     | 4        | 0   | 4     |
| Total                              | 135                      | 96       | 43    | 46       | 94  | 274   |

Data are n.

analyzed using a glucose-oxidase method. Confirmatory testing was not performed.

Data from the OGTTs were analyzed using World Health Organization (1998) (10) and American Diabetes Association (1997) (11) diagnostic criteria for fasting and 2-h capillary plasma samples. For capillary glucose levels, these are as follows: diabetes, fasting glucose  $\geq 7.0$  mmol/l or 2-h value  $\geq 12.2$  mmol/l; impaired glucose tolerance (IGT), fasting glucose  $< 7.0$  mmol/l and 2-h value 8.9–12.1 mmol/l; and impaired fasting glucose, fasting glucose 6.1–6.9 mmol/l and 2-h value  $< 8.9$  mmol/l (if measured) (Table 1). The method used to calculate overall prevalence was based on our previous study (9). Assuming that subjects not tested had a prevalence of diabetes similar to those who were tested, it is possible to calculate the prevalence and 95% CIs for various categories of glucose intolerance for the entire population (9). A proportion of the known diabetic subjects equivalent to the ratio of “subjects tested to all samples eligible for testing” was added to the total tested sample, and this set of data was used for the denominator in the prevalence calculations in a standard fashion. The prevalence would be the same without this data manipulation, but this is necessary to give realistic 95% CIs. The alternative approach is to assume that all subjects not tested either had or did not have each of the diagnostic labels, which gives very wide (not 95%) CIs that encompass the true population prevalence but are too wide to be meaningful. The results are given in Table 2. These values were calculated using standard methods (Arcus Pro-Stats 3.25; Medical Computing, Aughton, U.K.). In view of the small numbers, subgroup analyses are not reported.

**RESULTS** — A total of 58 residents refused to consent to OGTT without providing a reason, and in another 227 cases, permission to participate was denied by the care home manager, the matron, or the next of kin on the basis of extreme frailty or acute illness. One resident died before the OGTT was undertaken. The demographic characteristics of consenting subjects were similar to those of the general care home population in the U.K. (12), and the authors were not aware of any obvious differences between subjects who consented and subjects who did not. Complete data on 274 OGTTs (median age 83 years, range 45–101) were available. There were 50 male white subjects (median age 79 years), 179 female white subjects (median age 86 years), 17 male nonwhite subjects (median age 72 years), and 28 female nonwhite subjects (median age 74 years).

The results of the 274 OGTTs are presented in Tables 1 and 2. The raw data presented in Table 1 shows that the majority of positive diagnoses for diabetes are derived from elevated 2-h glucose values ( $n = 43$ ), and only three residents had a purely elevated fasting capillary value  $> 7.0$  mmol/l. The calculated total prevalence is reported in Table 2. The actual

prevalence of known diabetes was 12.0%, whereas the calculated total prevalence (based on the method reported in reference 9) was 26.7%. The calculated overall prevalence of IGT was 30.2%. Only one subject had impaired fasting glucose according to the criteria previously stated. No significant differences were found between residential and nursing homes in prevalence rates of diabetes.

**CONCLUSIONS** — In this study of care homes, we found a 12% prevalence of known diabetes. This value is similar to figures reported in two previous studies of institutional settings in South Wales and North West England (2,7) and compares with a 6.0% prevalence rate in community-dwelling older subjects in the U.K. (9). By following OGTTs of approximately half of the remaining residents without known diabetes, it was calculated that at least one in four residents of residential and nursing homes meet diagnostic criteria for diabetes, and overall about one in two residents appear to have an abnormality of glucose tolerance. The particular problems of recruitment and consent for conducting research in long-term care settings have been widely acknowledged (13,14), and in our study, a large number of residents were unable to participate. However, the prevalence of diabetes among these subjects is unlikely (because of medical illness and/or frailty) to be lower than that of subjects tested. Indeed, we believe that we are more likely to have underestimated rather than overestimated the true prevalence of diabetes.

Based on fasting glucose level, the majority of residents tested would be classed as nondiabetic, but postchallenge hyperglycemia may have significance in defining a group of individuals at high cardiovascular risk, who may also have an elevated mortality rate, as recently dem-

**Table 2—Prevalence of diabetes with 95% CIs (where appropriate) in each category of glucose tolerance**

| Category of glucose tolerance                | Overall prevalence (%) | 95% CI    |
|----------------------------------------------|------------------------|-----------|
| Known diabetes                               | 12                     | —         |
| Newly detected diabetes                      | 14.8                   | 11.0–19.2 |
| IGT                                          | 30.2                   | 25.2–35.6 |
| Normal                                       | 43.1                   | 37.5–48.8 |
| Total of known plus newly detected diabetes* | 26.7                   | 21.9–32.0 |

\*Based on the method of calculation described by Croxson et al. (9).

onstrated in the DECODE study (15), which may be especially important in older subjects (16). The clinical significance of detecting IGT in this population of institutionalized subjects is uncertain, as is the relationship between these findings and the likely risk of microangiopathy. However, it is possible that residents with newly detected diabetes will benefit from early treatment of raised glucose levels by experiencing reduction of osmotic symptoms, improvement in cognition (17), and assessment of any vascular complications. Whereas these actions are unlikely to lead to an increase in life expectancy of diabetic residents, they may add some value to their quality of life.

Screening for diabetes in the absence of specific intervention data involving diabetic residents in care homes is currently unjustified in the absence of proven benefits. However, we do suggest that further studies be warranted, especially in view of the likelihood that a high prevalence of undetected diabetes is present.

**Acknowledgments**— We thank Mary Holden for her meticulous efforts in coordinating the study in the care homes.

# References

1. Patterson KR: Population screening for diabetes mellitus: report of the British Diabetic Association. *Diabet Med* 10:777–781, 1993
2. Sinclair AJ, Allard I, Bayer A: Observations of diabetes care in long-term institutional settings with measures of cognitive function and dependency. *Diabetes Care* 20:778–784, 1997
3. Grobin W: A longitudinal study of impaired glucose tolerance and diabetes mellitus in the aged. *J Am Geriatr Soc* 37:1127–1134, 1989
4. Wachtel TJ, Tetu-Mouradjian LM, Goldman DL, Ellis SE, O'Sullivan PS: Hyperosmolality and acidosis in diabetes mellitus: a three-year experience in Rhode Island. *J Gen Intern Med* 6:495–502, 1991
5. National Center for Health Statistics: The National Nursing Home Survey 1977. In *Summary for the United States Hyattsville, MD*. Washington, DC, U.S. Govt. Printing Office, 1979 (DHEWH publ. No. PHS-79-1794; Vital and Health Statistics, Ser. 3, no. 143)
6. Tariot PN, Ogden MA, Cox C, Williams TF: Diabetes and dementia in long-term care. *J Am Geriatr Soc* 47:423–429, 1999
7. Benbow SJ, Walsh A, Gill GV: Diabetes in institutionalised elderly people: a forgotten population? *BMJ* 314:1868–1869, 1997
8. Harris MI, Flegal KM, Cowie CC, Eberhardt MS, Goldstein DE, Little RR, Wiedmeyer H-M, Byrd-Holt DD: Prevalence of diabetes, impaired fasting glucose, and impaired glucose tolerance in U.S. adults: the Third National Health and Nutrition Examination Survey, 1988–1994. *Diabetes Care* 21:518–524, 1998
9. Croxson SCM, Burden AC, Bodington M, Botha JL: The prevalence of diabetes in elderly people. *Diabet Med* 8:28–31, 1991
10. Alberti KG, Zimmet PZ: Definition, diagnosis and classification of diabetes mellitus and its complications. Part 1: Diagnosis and classification of diabetes mellitus provisional report of a WHO consultation. *Diabet Med* 15:539–553, 1998
11. The Expert Committee on the Diagnosis and Classification of Diabetes Mellitus: Report of the Expert Committee on the Diagnosis and Classification of Diabetes Mellitus. *Diabetes Care* 20:1183–1197, 1997
12. Crawford VLS, Beringer TRO, Stout RW: Comparison of residential and nursing home care before and after the 1993 community care policy. *BMJ* 318:366, 1999
13. Hoffman P, Marron KR, Fillit H, Lobow LS: Obtaining informed consent in a teaching nursing home. *J Am Geriatr Soc* 31:565–569, 1983
14. Ouslander JG, Schelle JF: Research in nursing homes: practical aspects. *J Am Geriatr Soc* 41:182–187, 1993
15. The DECODE Study Group on Behalf of the European Diabetes Epidemiology Group: Consequences of the new diagnostic criteria for diabetes in older men and women: the DECODE Study (Diabetes Epidemiology: Collaborative Analysis of Diagnostic Criteria in Europe). *Diabetes Care* 22:1667–1671, 1999
16. Shaw JE, Hodge AM, de Courten M, Chitson P, Zimmet PZ: Isolated post-challenge hyperglycaemia confirmed as a risk factor for mortality. *Diabetologia* 42:1050–1054, 1999
17. Gradman TJ, Laws A, Thompson LW, Reaven GM: Verbal learning and/or memory improves with glycaemic control in older subjects with non-insulin-dependent diabetes mellitus. *J Am Geriatr Soc* 41:1305–1312, 1993
